# Supplementary material for: Good Health-Related Quality of Life in Older Patients One Year after mTBI despite Incomplete Recovery: An Indication of the Disability Paradox?
Source: MDPI journal article supplement (doi:10.3390/jcm13092655), 2024-05-01
Supplement: s1 [file s1]

**Supplemental Table S1:** Demographic and trauma characteristics of the patient group after imputation.

|                                                   | <b>Total<br/>(n=453)</b> | <b>Older mTBI<br/>patients<br/>(n=164)</b> | <b>Younger mTBI<br/>patients<br/>(n=289)</b> | <b>p-value*</b>  |
|---------------------------------------------------|--------------------------|--------------------------------------------|----------------------------------------------|------------------|
| <b>Age, mean <math>\pm</math>sd</b>               | 49.2 $\pm$ 18.2          | 68.6 $\pm$ 7.0                             | 39.2 $\pm$ 13.4                              | <b>&lt;0.001</b> |
| <b>Sex (Male), n(%)</b>                           | 270 (59.6)               | 98 (59.8)                                  | 172 (59.5)                                   | 0.96             |
| <b>Comorbidities, n(%)</b>                        | 155 (34.2)               | 105 (64.0)                                 | 50 (17.3)                                    | <b>&lt;0.001</b> |
| <b>GCS=15, n(%)</b>                               | 297 (65.6)               | 116 (70.7)                                 | 181 (62.6)                                   | 0.07             |
| <b>Hospital admission, n(%)</b>                   | 283 (62.5)               | 113 (68.9)                                 | 170 (58.8)                                   | <b>0.03</b>      |
| <b>Mechanism of injury, n(%)</b>                  |                          |                                            |                                              | 0.35             |
| Collision                                         | 108 (23.8)               | 31 (18.9)                                  | 77 (26.6)                                    |                  |
| Fall                                              | 309 (68.2)               | 124 (75.6)                                 | 185 (64.0)                                   |                  |
| Other cause                                       | 36 (7.9)                 | 9 (5.5)                                    | 27 (9.3)                                     |                  |
| <b>Discharged to home, n(%)</b>                   | 434 (95.8)               | 157 (95.7)                                 | 277 (95.8)                                   | 0.95             |
| <b>ISS, mean <math>\pm</math> sd</b>              | 7.3 $\pm$ 5.2            | 7.6 $\pm$ 4.9                              | 7.2 $\pm$ 5.0                                | 0.36             |
| <b>CT-abnormalities, n(%)</b>                     | 78 (17.2)                | 33 (20.1)                                  | 45 (15.6)                                    | 0.24             |
| <b>Pre-injury physical<sup>†</sup>, n(%)</b>      | 114 (24.7)               | 57 (34.8)                                  | 57 (19.7)                                    | <b>&lt;0.001</b> |
| <b>Pre-injury mental health<sup>†</sup>, n(%)</b> | 33 (7.3)                 | 11 (6.7)                                   | 22 (7.6)                                     | 0.72             |
| <b>Educational level high, n(%)</b>               | 227 (50.1)               | 67 (40.9)                                  | 160 (55.4)                                   | <b>&lt;0.01</b>  |
| <b>Living alone, n(%)</b>                         | 86 (19.0)                | 29 (17.7)                                  | 57 (19.7)                                    | 0.60             |

Legend: Results are represented as number with percentages if not indicated otherwise. Older patients: aged  $\geq$  60 years, Younger patients: aged < 60 years, GCS: Glasgow Coma Scale, ISS: Injury Severity Score, CT: Computed Tomography, sd: standard deviation, \* p-value of the difference between age-groups, † Pre-injury mental or physical health complaints.

**Supplemental Table S2:** Univariate and multivariable analysis of the predictors of one year post-injury HRQoL for younger patients (< 60 years).

|                                       |                       | Poor one year post-injury HRQoL perception of younger patients (N=289) |           |         |               |           |         |
|---------------------------------------|-----------------------|------------------------------------------------------------------------|-----------|---------|---------------|-----------|---------|
| Coding                                |                       | Univariate                                                             |           |         | Multivariable |           |         |
|                                       |                       | OR                                                                     | 95% CI    | p-value | OR            | 95% CI    | p-value |
| <i>Baseline data</i>                  |                       |                                                                        |           |         |               |           |         |
| <b>Gender</b>                         | Male (0) – Female (1) | 1.53                                                                   | 0.87-2.69 | 0.14    | NS            | NS        | NS      |
| <b>Education level</b>                | Low (0) – High (1)    | 0.72                                                                   | 0.41-1.28 | 0.26    | NS            | NS        | NS      |
| <b>GCS score ED</b>                   | < 15 (0) – 15 (1)     | 1.53                                                                   | 0.87-2.71 | 0.14    | NS            | NS        | NS      |
| <b>Pre-injury physical complaints</b> | No (0) – Yes (1)      | 2.85                                                                   | 1.50-5.41 | <0.01   | NS            | NS        | NS      |
| <b>Pre-injury mental health</b>       | No (0) – Yes (1)      | 10.24                                                                  | 3.95-26.6 | <0.01   | 6.64          | 2.21-20.0 | <0.01   |
| <b>CT-abnormalities</b>               | No (0) – Yes (1)      | 2.07                                                                   | 1.03-4.15 | 0.04    | NS            | NS        | NS      |
| <i>Two weeks post-injury</i>          |                       |                                                                        |           |         |               |           |         |
| <b>Active coping style</b>            | No (0) – Yes (1)      | 0.76                                                                   | 0.40-1.54 | 0.40    | NS            | NS        | NS      |
| <b>Passive coping style</b>           | No (0) – Yes (1)      | 3.30                                                                   | 1.80-6.06 | <0.01   | NS            | NS        | NS      |
| <b>Avoidant coping style</b>          | No (0) – Yes (1)      | 0.91                                                                   | 0.49-1.68 | 0.77    | NS            | NS        | NS      |
| <b>Posttraumatic complaints</b>       | 0-27                  | 1.14                                                                   | 1.06-1.22 | <0.01   | NS            | NS        | NS      |
| <b>Anxiety scores</b>                 | 0-19                  | 1.27                                                                   | 1.17-1.39 | <0.01   | 1.13          | 1.02-1.26 | 0.02    |
| <b>Depression scores</b>              | 0-19                  | 1.29                                                                   | 1.19-1.40 | <0.01   | 1.20          | 1.09-1.32 | <0.01   |
| <b>Posttraumatic stress</b>           | 0-61                  | 1.05                                                                   | 1.03-1.07 | <0.01   | NS            | NS        | NS      |

Legend: CT: Computed Tomography, GCS = Glasgow Coma Scale, ISS = Injury Severity Score, HADS-A/D: Hospital Anxiety and Depression Scale- Anxiety or Depression, HRQoL = Health related quality of life.
